# Supplementary material for: How effective is undergraduate palliative care teaching for medical students? A systematic literature review
Source: PubMed Central journal article supplement — BMJ Open. 2020 Sep 9;10(9):e036458. doi: 10.1136/bmjopen-2019-036458 (PMC7482461; doi:10.1136/bmjopen-2019-036458), 2020-09-09
Supplement: bmjopen-2019-036458supp001.pdf [file bmjopen-2019-036458supp001.pdf]

Database: Embase <1974 to 2020 March 09>

Search Strategy:

- 
- 1 exp palliative therapy/ or exp terminal care/ or hospice care/ (157404)
  - 2 terminally ill patient/ (7790)
  - 3 "death and dying"/ (6)
  - 4 (palliative care or palliative treatment or palliative therapy or palliation).mp. (126295)
  - 5 (terminal care or "end of life care" or hospice\$).mp. (59049)
  - 6 terminally ill patient\$.mp. (9517)
  - 7 (patient\$ adj3 (dying or "close to death" or "end of life")).mp. (12999)
  - 8 or/1-7 (189680)
  - 9 medical education/ (213384)
  - 10 undergraduate student/ (6077)
  - 11 9 and 10 (819)
  - 12 (med\$ adj3 undergrad\$).mp. (9623)
  - 13 Students, Medical/ (54203)
  - 14 medical student\$.mp. (78609)
  - 15 medical school/ (56832)
  - 16 medical school\$.mp. (75373)
  - 17 or/11-16 (134462)
  - 18 8 and 17 (1964)
  - 19 exp Teaching/ (89532)
  - 20 (teach\$ or learn\$ or lecture\$ or small group\$ or reflection or reflective or pedagogy or workshop\$ or online or virtual or quiz or video).mp. (1328890)
  - 21 pedagogic\$.mp. (8113)
  - 22 or/19-21 (1331790)
  - 23 18 and 22 (970)
  - 24 academic achievement/ or professional competence/ or clinical competence/ or self-evaluation/ (153355)
  - 25 (outcome\$ or effective\$ or confidence or confident or knowledge or success\$ or fail\$ or fear or thanatophobi\$).mp. (8513098)
  - 26 palliative care scale.mp. (20)
  - 27 best practice.mp. (21427)
  - 28 competen\$.mp. (242000)
  - 29 (measure\$ or assess\$).mp. (8024940)
  - 30 or/24-29 (13437333)
  - 31 23 and 30 (723)
